1 Can a population targeted by a CRISPR-based homing gene  
2 drive be rescued?

3 Nicolas O. Rode\*, Virginie Courtier-Orgogozo†, Florence Débarre‡

4 \* CBGP, INRAE, CIRAD, IRD, Montpellier SupAgro, Univ Montpellier, Montpellier, France

5 † Institut Jacques Monod, CNRS UMR7592, Univ. de Paris, 75013 Paris, France

6 ‡ Sorbonne Université, CNRS, IRD, INRA, Institute of Ecology and Environmental Sciences-Paris  
7 (IEES Paris), place Jussieu, 75005 Paris, France

8 ORCID: 0000-0002-1121-4202 (N.O.R.), 0000-0002-9297-9230 (V. C.-O.), 0000-0003-2497-833X  
9 (F.D.)

10 Corresponding authors: E-mails: [florence.debarre@normalesup.org](mailto:florence.debarre@normalesup.org); [virginie.courtier@ijm.fr](mailto:virginie.courtier@ijm.fr);  
11 [nicolas.rode@inrae.fr](mailto:nicolas.rode@inrae.fr)

12

13 Keywords: Genetic control, gene drive brake, theoretical model

14 Running title: Rescue of a population targeted by a CRISPR-based homing gene drive

15 *Article type: Investigation*

16 Abbreviations:

17 CRISPR: Clustered Regularly Interspaced Short Palindromic Repeats

18

19

## 20 **Article summary for Issue Highlights (100 words)**

21 Homing gene drive is a new genetic control technology that aims to spread a genetically engineered  
22 DNA construct within natural populations even when it impairs fitness. In case of unanticipated  
23 damages, it has been proposed to stop homing gene drives by releasing individuals carrying a gene-  
24 drive brake; however, the efficiency of such brakes has been little studied. The authors develop a model  
25 to investigate the dynamics of a population targeted by a homing drive in absence or in presence of  
26 brake. The model provides insights for the design of more efficient brakes and safer gene drives.

27 (96 words)

## 28 **Abstract (250 words):**

29 CRISPR-based homing gene drive is a genetic control technique aiming to modify or eradicate natural  
30 populations through the release of individuals carrying an engineered piece of DNA that can be inherited  
31 by all their progeny. Developing countermeasures is important to control the spread of gene drives,  
32 should they result in unanticipated damages. One proposed countermeasure is the introduction of  
33 individuals carrying a brake construct that targets and inactivates the drive allele but leaves the wild-  
34 type allele unaffected. Here we develop models to investigate the efficiency of such brakes. We consider  
35 a variable population size and use a combination of analytical and numerical methods to determine the  
36 conditions where a brake can prevent the extinction of a population targeted by an eradication drive.  
37 We find that a brake is not guaranteed to prevent eradication and that characteristics of both the brake  
38 and the drive affect the likelihood of recovering the wild-type population. In particular, brakes that  
39 restore fitness are more efficient than brakes that do not. Our model also suggests that threshold-  
40 dependent drives (drives that can spread only when introduced above a threshold) are more amenable  
41 to control with a brake than drives that can spread from an arbitrary low introduction frequency  
42 (threshold-independent drives). Based on our results, we provide practical recommendations and  
43 discuss safety issues.

44

## 45 Introduction

46 The use of engineered gene drives has been proposed as a technique for population control with  
47 potential applications in public health, agriculture and conservation (Burt 2003; Esvelt *et al.* 2014). This  
48 technique relies on the release of genetically engineered individuals that can rapidly propagate a  
49 transgene of interest into wild populations. Gene drive can be designed to modify, suppress or eradicate  
50 various target species (Scott *et al.* 2018; Rode *et al.* 2019). Potential target species include disease  
51 vectors (e.g. *Anopheles gambiae*, the main vector of malaria in Africa; Kyrou *et al.* 2018), agricultural  
52 pests (e.g. *Drosophila suzukii*, a major pest of soft fruits; Scott *et al.* 2018) or invasive rodents (e.g.  
53 invasive house mouse or black rats that threaten biodiversity on islands; Leitschuh *et al.* 2018).

54 Due to the universality of CRISPR genome editing, CRISPR-based gene drives can potentially be  
55 applied to a wide variety of organisms (Esvelt *et al.* 2014; Raban *et al.* 2020). Diverse CRISPR-based  
56 gene drive systems have already been developed in the laboratory as proofs-of-principle in a few model  
57 organisms (homing, split homing, translocation, X-shredder, killer-rescue, cleave-and-rescue and  
58 TARE gene drives; Webster *et al.* 2019; see Raban *et al.* 2020 for a review; Champer *et al.* 2020) or as  
59 theoretical possibilities (daisy chain drives; Noble *et al.* 2019). Gene drives have so far only been tested  
60 in the laboratory and no field trial has been conducted yet.

61 Among these systems, CRISPR-based homing gene drives are the most adaptable to new species and  
62 populations and the most advanced in terms of technological development (Raban *et al.* 2020). They  
63 involve a piece of DNA that includes a guide RNA (gRNA) gene and a *cas9* gene (encoding for the  
64 Cas9 endonuclease). The gRNA is designed to recognize a specific sequence in a wild-type  
65 chromosome, so that that in heterozygotes carrying a drive allele and a wild-type allele, the Cas9-gRNA  
66 molecular complex will cut the wild-type chromosome at the target site. The resulting double-strand  
67 DNA break can then be repaired through homology-directed repair (also known as “gene conversion”),  
68 using the drive allele as a template, which is designed to harbor sequences identical to the ones flanking  
69 the target site. Consequently, the drive allele is transmitted to the next generation at rates beyond those  
70 of regular Mendelian inheritance and, if its parameters allow it, will rapidly spread within the target  
71 population.

72 Homing gene drives are sometimes considered as “threshold-independent drives”, i.e. as being able to  
73 spread in a population from an arbitrary low introduction frequency (e.g. Marshall and Akbari 2018).  
74 Mathematical models of homing gene drives (e.g. Deredec *et al.* 2008; Alphey and Bonsall 2014;  
75 Unckless *et al.* 2015; Tanaka *et al.* 2017) have however shown that depending on various parameters  
76 (the efficacy of gene conversion, its timing, the fitness cost incurred by the drive allele and its  
77 dominance over the wild-type allele), some of the homing gene drives can be threshold-dependent, i.e.  
78 only spread if they are introduced above a threshold frequency. Mathematically, when there is an  
79 equilibrium at an intermediate frequency of the drive allele ( $0 < p_D < 1$ ) and when this equilibrium is  
80 unstable, then the drive is threshold-dependent; the value of the drive allele frequency at this equilibrium  
81 is the threshold above which the drive has to be introduced to spread (Deredec *et al.* 2008).

82 Given that gene drives can potentially impact biodiversity, national sovereignty and food security (Oye  
83 *et al.* 2014; Akbari *et al.* 2015; DiCarlo *et al.* 2015; NASEM 2016; Montenegro de Wit 2019), there is  
84 a crucial need to develop strategies to minimize the risks of unintentional spread (e.g. following the  
85 escape of gene drive individuals from a laboratory) and to mitigate unanticipated or premeditated and  
86 malevolent harm to humans or the environment. For example, a CRISPR-based eradication drive may  
87 spread into a non-target population or species (Noble *et al.* 2018; Courtier-Orgogozo *et al.* 2019a; Rode  
88 *et al.* 2019); a modification drive may alter the target population in an unexpected, detrimental manner;

89 or a gene drive could be used as bioweapon (Gurwitz 2014), for example to modify a locally important  
90 pollinator insect species and cause heavy agricultural production losses. Decreasing the environmental  
91 risks associated with the development of this technology can be achieved by designing safer gene drives  
92 whose spread can be controlled spatially or temporally (Marshall and Akbari 2018; Raban *et al.* 2020)  
93 and by developing countermeasures to stop the spread of an ongoing gene drive (Esvelt *et al.* 2014;  
94 Gantz and Bier 2016; Vella *et al.* 2017).

95 Several countermeasure strategies for CRISPR-based homing gene drives have been proposed. One  
96 strategy is to use gene drives whose non-Mendelian transmission is conditional on the presence of  
97 synthetic molecules in the environment of the target species, so that the removal of the synthetic  
98 molecule is expected to stop the spread of the gene drive, and natural selection to remove the drive from  
99 the population (Esvelt *et al.* 2014; Del Amo *et al.* 2020). However, the development of such molecule-  
100 dependent drives is still at its infancy and may have to be tailored for each ecosystem and target species.  
101 Another strategy is to introduce resistant individuals carrying a modified target locus that prevents  
102 homing (“synthetic resistant” (SR) allele; Burt 2003; Champer *et al.* 2016; Vella *et al.* 2017). Such  
103 synthetic resistant alleles are however predicted to be rather ineffective against replacement drives with  
104 small fitness costs (Vella *et al.* 2017), because of the limited selective advantage of synthetic resistant  
105 alleles. Alternatively, it has been proposed to release suppressor individuals that carry a new piece of  
106 DNA which will eventually lead to the knock-out of the initial gene drive (Esvelt *et al.* 2014; Marshall  
107 and Akbari 2018). These alternative countermeasures rely on gene conversion and can be used against  
108 virtually any type of CRISPR-based homing gene drive. Two types exist. The first type are  
109 countermeasures that include the *cas9* gene and that can target the drive only (reversal drives sensu  
110 Esvelt *et al.* 2014; overwriting drives; DiCarlo *et al.* 2015) or both the drive and wild-type alleles  
111 (immunizing reversal drive (IRD); Esvelt *et al.* 2014; Vella *et al.* 2017). However, with these strategies,  
112 a functional *cas9* gene will remain in the final population, which may increase the risk of subsequent  
113 genetic modifications such as translocations, and possible negative environmental outcomes (Courtier-  
114 Orgogozo *et al.* 2019b). The second type are countermeasures that do not encode for *cas9* and rely  
115 instead on the *cas9* gene present in the initial gene drive construct. They can be contained in a single  
116 locus (ERACR: element for reversing the autocatalytic chain reaction, Gantz and Bier 2016; CATCHA:  
117 Cas9-triggered chain ablation, Wu *et al.* 2016), or be across two loci (CHACR: construct hitchhiking  
118 on the autocatalytic chain reaction, Gantz and Bier 2016). These countermeasures might be safer for  
119 the environment, due to the absence of a functional *cas9* gene. To our knowledge, neither ERACR nor  
120 CHACR have been implemented in the lab; CHACR may be slow to spread due to its two-locus  
121 structure, while ERACR may be sensitive to the evolution of resistance at its target sites (*cas9*-flanking  
122 sequences whose mutation does not affect enzyme function).

123 We focus here on the in our opinion best gene-drive-based countermeasures proposed so far, the *cas9*-  
124 devoid reversal drives (CATCHA, ERACR), which we call hereafter “brakes” for simplicity. In  
125 drive/brake heterozygotes, the encoded guide RNA(s) target and inactivate the *cas9* gene of the initial  
126 gene drive construct. Such brakes should be especially efficient, because even in absence of homology-  
127 directed repair, the drive’s *cas9* gene (targeted by the brake) is expected to be inactivated. However, for  
128 simplicity, we will not model this additional scenario here.

129 Although mathematical modelling of the effects of brakes has been recommended (Wu *et al.* 2016), to  
130 our knowledge only two such studies have been published (Vella *et al.* 2017; Girardin *et al.* 2019).  
131 Vella *et al.* found that the introduction of a brake leads to a polymorphic equilibrium with transient  
132 oscillatory dynamics (Figure 2d,e in Vella *et al.* 2017). They also showed that brakes with smaller  
133 fitness costs increased the likelihood of long-term eradication of the homing gene drive (Figure 3 in  
134 Vella *et al.* 2017). We note that because Vella *et al.* assumed 100% cleavage and germline conversion,

135 the drive they modeled was threshold-independent (Deredec *et al.* 2008). Girardin *et al.* (2019)  
136 considered a spatial model, and found that a brake could stop a spatially spreading drive only if the  
137 drive was threshold-dependent, and that threshold-independent drives led to an infinite spatial chase of  
138 the drive by the brake. While both studies provided insights on our ability to control an ongoing gene  
139 drive, they had limitations. First, both studies used classical population-genetic frameworks, and  
140 focused on allele frequency dynamics, ignoring changes in population size. They thereby omitted  
141 potential demographic feedbacks on allele frequency changes, which are likely to be important for  
142 eradication drives. It thus remains unknown whether a brake can prevent the extinction of a population  
143 targeted by an eradication drive. Second, both studies used deterministic models. Vella *et al.*  
144 acknowledged that oscillations of the allele frequencies in their model could lead to the stochastic loss  
145 of an allele. Similar oscillations were observed by Girardin *et al.* (2019), but their implications were not  
146 explored.

147 To address some of the limitations of previous models and examine further the effectiveness of brakes,  
148 we model here the dynamics of a population targeted by a drive, into which brake-carrying individuals  
149 are released. We consider a variable population size and its potential feedback onto gene frequency  
150 changes, and we also develop a stochastic version of the model. We compare two timings of gene  
151 conversion for gene drive and brake alleles (in the germline or zygote, Figure S1) and explore the role  
152 of parameters such as level of dominance, cleavage efficiency, brake-associated fitness costs (whether  
153 or not it restores fitness), and the type of fitness component targeted by the gene drive (embryo survival,  
154 fecundity or adult death rate). We contrast brakes that restore fitness with those that do not.  
155 Implementing brakes that restore fitness (i.e. “specific brakes”) require prior knowledge of the gene  
156 disrupted by the homing drive in order to include in the brake a recoded version of this gene along with  
157 a gRNA that targets the *cas9* sequence of the drive allele. Hence, drive-brake heterozygous individuals  
158 have higher fitness than drive homozygotes, but may have lower fitness than wild-type homozygotes  
159 (as they may incur a small fitness cost due to the expression of the gRNA). Implementing CATCHA  
160 brakes that do not restore fitness (i.e. “universal brakes”) does not require prior knowledge of the gene  
161 disrupted by the homing drive as such brakes only include a gRNA that targets the *cas9* sequence of the  
162 drive allele. Hence, drive-brake heterozygous individuals have the same fitness as drive homozygotes.

163 Eradication drives currently under development target genes involved in female development in various  
164 human-disease vectors (Kyrou *et al.* 2018) or agricultural pests (Li and Scott 2016). Because they have  
165 the strongest demographic consequences and pose the greatest risks of unwanted spread, we focus on  
166 threshold-independent eradication drives in the numerical part of our study. We aim at finding the  
167 characteristics of the brakes that can efficiently stop an ongoing gene drive and allow the recovery of a  
168 wild-type population.

## 169 **Methods**

### 170 **Analytical model**

171 With three different alleles in the population (wild-type  $0$ , drive  $D$  and brake  $B$ ), we need to follow the  
172 dynamics of six diploid genotypes. We denote by  $G = \{00, 0D, DD, 0B, DB, BB\}$  the set of all possible  
173 genotypes. To take into account gene drives that affect population size (e.g. eradication drives), we  
174 consider the densities of individuals of each genotype and do not focus solely on genotype frequencies  
175 as previous models did (Deredec *et al.* 2008; Unckless *et al.* 2015; Vella *et al.* 2017; Girardin *et al.*  
176 2019). We denote the density of individuals of genotype  $g$  by  $N_g$  and the total population density by

177  $N$  (omitting the time dependence ( $t$ ) for concision;  $N = \sum_g N_g$ ). We consider three traits affecting  
 178 fitness that can vary among genotypes: the survival of zygotes ( $\omega_g$ ), the death rate of adults ( $d_g$ ), and  
 179 the fecundity of adults ( $\beta_g$ ). We assume that reproduction is density-dependent: it depends on the total  
 180 population size  $N$ , following a classical logistic regulation with carrying capacity  $K$ . The death rate, on  
 181 the other hand, is density-independent. The change over time in the density of individuals of genotype  
 182  $g$  is given by

$$\frac{dN_g}{dt} = \omega_g V_g N(1 - N/K) - d_g N_g, \quad (1)$$

183 where  $V_g$  corresponds to the production of new individuals of genotype  $g$  through sexual reproduction  
 184 and depends on the abundances of all genotypes, their fecundities  $\beta_g$ , but also on the timing of gene  
 185 conversion. The formulas of the  $V_g$  terms for each timing of gene conversion are given in the Appendix  
 186 (and also provided in the supplementary Mathematica file).

187 We consider that gene conversion in  $0D$  or  $DB$  heterozygous individuals can either occur in the  
 188 germline or in the zygote (Fig. S1). When gene conversion occurs in the germline,  $0D$  and  $DB$   
 189 heterozygous individuals produce more than 50% of  $D$  and  $B$  gametes respectively. When gene  
 190 conversion occurs in newly formed zygotes (i.e. immediately after fertilization),  $0D$  and  
 191  $DB$  heterozygous individuals are converted into  $DD$  and  $BB$  homozygotes respectively and have the  
 192 corresponding traits. For both types of gene conversion, we denote the probabilities of successful gene  
 193 conversion by drive and by brake alleles by  $c_D$  and  $c_B$  respectively.

## 194 Numerical explorations

195 While our analytic results are obtained with generic parameters, numerical explorations require specific  
 196 parameter values. The number of parameter combinations to explore being very vast, we make a few  
 197 assumptions to reduce it. First, we consider that drive and brake affect either (i) zygote survival ( $\omega$ ),  
 198 (ii) adult survival ( $d$ ) or (iii) adult fecundity ( $\beta$ ), all other parameters remaining equal across genotypes.  
 199 To model an eradication drive, we chose  $\omega_{DD}$ ,  $d_{DD}$  or  $\beta_{DD}$  such that a 100% drive population is not  
 200 viable and standardised the parameters to yield the same negative equilibrium value of population size  
 201 (we set  $\frac{d_{DD}}{\omega_{DD} b_{DD}^2} = 1.1$ , see Mathematica Appendix for details). We consider that either the brake allele  
 202 does not restore the fitness loss due to the drive allele (i.e. it has the same fitness as the drive allele), or  
 203 that the brake allele restores partially the fitness loss and has a small fitness cost compared to the wild-  
 204 type allele (i.e. it contains a specific cargo that helps to restore fitness). We use the same dominance  
 205 parameter,  $h$ , for both drive and brake alleles. When the brake allele does not restore fitness, its  
 206 dominance is the same as that of the drive allele. When the brake allele does restore fitness, we consider  
 207 that  $h$  has little effect on the fitness of  $0B$  heterozygous as the fitness  $BB$  homozygotes is much closer  
 208 to that of  $00$  than of  $DD$  homozygotes. For juvenile survival, the parameters of heterozygotes read:

$$\begin{aligned} \omega_{0D} &= (1 - h)\omega_{00} + h\omega_{DD} \\ \omega_{0B} &= (1 - h)\omega_{00} + h\omega_{BB} \\ \omega_{DB} &= (1 - h)\omega_{BB} + h\omega_{DD}, \end{aligned} \quad (2)$$



209 and likewise for  $d$  and  $\beta$  parameters. In the numerical part of the study, we consider either complete  
210 recessivity ( $h = 0$ ) or codominance ( $h = 0.5$ ).

211 We therefore have 24 combinations of parameters (2 timings of gene conversion x 3 traits affected x  
212 dominance values x 2 types of brake). For each of them, we consider different timings of introduction  
213 of the brake in the population; the timing is given in terms of the current frequency  $f_I$  of the drive allele  
214 in the population at the time at which the brake is introduced. The  $N^{(0)}_{0B}$  parameter represents the  
215 number of released wild-type/brake heterozygous individuals. Unless stated, we assume that  $N^{(0)}_{0B} =$   
216 100. Other parameters are shown in tables S1-S3.

## 217 Reformulating the model

218 Our model is initially defined in terms of genotype densities (equation 1). To simplify the analyses, we  
219 reparametrize the model in terms of total population size  $N$ , allele frequencies  $p_D$  and  $p_B$  (we have  $p_0 =$   
220  $1 - p_D - p_B$ ), and deviations from Hardy-Weinberg for each of the three heterozygotes  
221 ( $\delta_{0D}$ ,  $\delta_{0B}$ ,  $\delta_{DB}$ ). In particular,

$$N = N_{00} + N_{0D} + N_{DD} + N_{0B} + N_{DB} + N_{BB}, \quad (3a)$$

$$p_D = \frac{N_{DD} + \frac{1}{2}N_{0D} + \frac{1}{2}N_{DB}}{N}, \quad (3b)$$

$$\delta_{0D} = \frac{N_{0D}}{N} - 2p_D p_0, \quad (3c)$$

222 and likewise for  $p_B$ ,  $\delta_{0B}$  and  $\delta_{DB}$  (the full equations are calculated in the supplementary Mathematica  
223 file).

224 As usual with most continuous-time models (Nagylaki and Crow 1974), we cannot neglect deviations  
225 from Hardy-Weinberg frequencies here (unlike models with discrete, non-overlapping generations).  
226 The reformulated model (system (3)) also highlights interactions between total population size  $N$  and  
227 changes in allele frequencies (eco-evolutionary feedbacks). The population growth rate depends on  
228 population composition, since fecundity or survival parameters are genotype-dependent. Reciprocally,  
229 changes in allele frequencies depend on the size of the population. This is because gene conversion,  
230 which modifies allele frequencies, takes place upon reproduction (either in the germline, or in the newly  
231 formed zygote). Given that reproduction is negatively density-dependent, changes in the frequencies of  
232 drive and brake alleles slow down when population size is larger.

## 233 Stability analyses

234 We use the reformulated version of the model (system (3)) to find evolutionary equilibria and analyse  
235 their stabilities.

### 236 Model without the brake

237 We first study the properties of our model when the brake is absent (setting all variables containing the  
238 brake allele equal to zero). We determine the equilibrium states where only one allele is present (i.e.  
239 boundary equilibria). At the wild-type-only equilibrium, we have  $N = K(1 - \frac{a_{00}}{\omega_{00}b_{00}^2})$ ,  $p_D = 0$ ,  $\delta_{0D} =$   
240 0 (see Mathematica Appendix for details). At the drive-only equilibrium, the size of the population  
241 depends on the type of drive. As we only consider eradication drives (i.e. drives such that a drive-only

242 population is not viable), we have  $N = 0$ ,  $p_D = 1$ ,  $\delta_{0D} = 0$  at the drive-only equilibrium (for  
243 completeness though, we included in the Mathematica appendix a separate stability analysis of the  
244 drive-only equilibrium for replacement drives). Generic formulas for interior equilibria (i.e. for which  
245  $0 < p_D < 1$ ) could not be found analytically.

246 Model with the brake

247 For simplicity, in the full model with the three alleles, we only study the stability of the wild-type-only  
248 equilibrium ( $N = K(1 - \frac{d_{00}}{\omega_{00}b_{00}^2})$ ,  $p_D = 0$ ,  $p_B = 0$ ,  $\delta_{0D} = 0$ ,  $\delta_{0B} = 0$ ,  $\delta_{DB} = 0$ ).

## 249 Numerical solutions and stochastic simulations

250 Deterministic solutions of the model

251 To test the robustness of the equilibrium states predicted by our analytical model, we solve the model  
252 numerically for specific sets of parameters, using the original formulation in equation 1. We use  
253 parameter values for a threshold-independent eradication drive (i.e. as explained in the result section  
254 below, conditions where, according to the stability analysis of our model, the wild-type population  
255 cannot be recovered after the introduction of the brake). Time is discretized; we consider small fixed  
256 time steps  $dt = 0.005$ . When the system undergoes oscillations, genotype densities can go down to  
257 extremely small values, possibly below computer precision. We therefore set a critical value  $thr =$   
258  $0.01$ , below which the density of a genotype is considered to be zero.

259 Stochastic simulations

260 To explore the effect of stochasticity on our model, we implement a stochastic version of it using a  
261 Gillespie algorithm. As for numeric simulations, we only consider parameter values for a threshold-  
262 independent eradication drive. In short, within a time step we (i) compute the rates (or “propensities”)  
263 of all possible events (birth and death probabilities of each of the five genotypes); (ii) randomly pick  
264 one event (the higher the event's rate, the more likely its occurrence); (iii) update the population  
265 according to the event that has taken place; (iv) draw the time interval that lasted the step (according to  
266 an exponential distribution parameterized by the sum of all propensities). For each set of parameter  
267 values, we run 10000 simulations, each of them until a maximum time value ( $t_{max} = 25000$ ) or until  
268 the population goes extinct. For each simulation, we list the different types of outcome (i.e., WT  
269 recovery after introduction of the brake, coexistence between the wild type and either the brake or both  
270 the initial gene drive and the brake, extinction before or after the introduction of the brake, drive loss  
271 before brake introduction).

## 272 Data availability

273 Supplemental Material Files S1-S2 is available at Figshare:

274 <https://doi.org/10.6084/m9.figshare.11982285.v1>

275 File S1 contains supplemental script for the analytical model (Mathematica notebook). File S2 contains  
276 scripts for numerical explorations and stochastic simulations.



## 277 **Results**

278 To assess the efficiency of various types of brakes to control gene drives, we use a combination of  
279 (i) analytical techniques (stability analysis of the deterministic model), (ii) numerical solutions of the  
280 deterministic model, and (iii) stochastic simulations. The stability analysis (i) is done with generic  
281 parameters. For the numerical steps of our exploration of the model ((ii) and (iii)), we use specific  
282 parameters corresponding to threshold-independent eradication drives, i.e. drives that spread from very  
283 low frequencies, and whose fixation leads to the extinction of the population.

### 284 **There are four categories of homing drives**

285 To better understand the dynamics of the full model with three alleles (wild-type, drive, brake), we first  
286 study the model in the absence of brake. This analysis is done using generic parameters, separately for  
287 each timing of gene conversion (zygote vs. germline conversion).

288 In this two-allele version of the model, there are two boundary equilibria: drive loss (the wild-type allele  
289 is fixed) and drive fixation. These two equilibria can be locally stable or unstable, so that there are up  
290 to four possible combinations of stabilities and therefore four possible outcomes: (i) drive loss, (ii)  
291 coexistence of the drive and wild-type alleles, (iii) drive fixation, (iv) bistability (Deredec *et al.* 2008;  
292 Alphey and Bonsall 2014; Unckless *et al.* 2015; Noble *et al.* 2017; Vella *et al.* 2017; Girardin *et al.*  
293 2019). Drives in (ii) and (iii) will invade the wild-type population from an arbitrary low frequency and  
294 are “threshold-independent” (Marshall and Akbari 2018). Drives in (iv) can either spread and fix when  
295 the drive allele is introduced at a high enough frequency or will be lost when their introduction  
296 frequency is below a given threshold (i.e. there is a bistability). This type of drive is “threshold-  
297 dependent” (Akbari *et al.* 2013; Marshall and Akbari 2018). The parameter ranges corresponding to  
298 each outcome are illustrated in the supplementary Mathematica file, for replacement and eradication  
299 drives; they are consistent with the findings of previous studies (Deredec *et al.* 2008; Unckless *et al.*  
300 2015; Vella *et al.* 2017; Girardin *et al.* 2019). The eradication drives used so far in laboratory studies  
301 (Kyrrou *et al.* 2018) (large fitness cost, high conversion efficiency, recessivity and conversion in the  
302 germline) correspond to threshold-independent drives.

### 303 **Stability analyses indicate that a brake can recover the wild-type** 304 **population only if the drive is threshold-dependent**

305 When the brake allele has lower fitness than the wild-type allele, the three alleles (wild-type, drive and  
306 brake), are involved in non-transitive interactions (rock-paper-scissors type; Vella *et al.* 2017): the wild-  
307 type is converted into a drive by the drive, the drive into a brake by the brake, and the brake is costly  
308 compared to the wild-type. A high frequency of the wild-type, drive or brake in the population favors  
309 the drive, brake or wild-type respectively. Such negative-frequency-dependent selection can result in  
310 the coexistence of the three alleles.

311 In the analytical model with the three alleles, we find that the conditions for the local stability of the  
312 wild-type-only equilibrium are the same as in the model without brake (details of the calculations are  
313 presented in the supplementary Mathematica file). In other words, our stability analysis indicates that  
314 the introduction of a brake can successfully restore a wild-type population only under two conditions.  
315 First, quite trivially, the wild-type population can be recovered when the population is targeted by a  
316 drive that would be lost in the absence of brake (drive loss equilibrium above; we ignore this case  
317 thereafter). Second, the wild-type population can be recovered when it is targeted by a threshold-

318 dependent drive (i.e. with parameters corresponding to a bistability in the model without brake, see  
319 above). In this case, introducing the brake allele can decrease the frequency of the drive allele below its  
320 invasion threshold; the drive is then lost. Once the drive is lost, if it is, the brake loses the competition  
321 against the wild-type allele because of its fitness cost, and the wild-type population is finally recovered.

322

## 323 Numerical explorations of the deterministic model and stochastic 324 simulations show that brakes can stop threshold-independent drives 325 under certain conditions

### 326 Numerical solutions of the deterministic model

327 The introduction of a brake in a population targeted by a threshold-independent drive may lead to  
328 oscillations of large amplitude. During these oscillations, the densities of some genotypes may reach  
329 extremely low values. Biologically, this is not realistic: however big a population, an extremely low  
330 density may correspond to less than one individual, and thus to the loss of an allele from the population.  
331 Computationally as well, these oscillations are challenging, because they may lead to values below the  
332 minimum number that a computer can represent, and therefore to the failure of numerical solutions. To  
333 solve both issues, we set a critical density below which a genotype is considered absent from the  
334 population and we numerically integrate our model to further explore the effect of the introduction of a  
335 brake in a population targeted by a threshold-independent eradication drive. Cutting large amplitude  
336 cycles means that alleles can be lost. The dynamics of the frequencies of the three alleles and of  
337 population size (scaled by the equilibrium density of the wild-type population) are shown in Figure 2.  
338 These dynamics depend on the trait that is affected by the drive and the brake (fecundity, adult mortality,  
339 or zygote survival; lines in Figure 2), the level of dominance (columns in Figure 2), and whether the  
340 brake restores fitness or not (Figures S3 vs. 2).

341 The addition of a critical density leads to outcomes that were not predicted by our stability analysis.  
342 Contrary to the predictions of the stability analysis for threshold-independent drives, in Figures 2(a) and  
343 2(f), the drive is lost, allowing for population recovery. This is because the density of drive-carrying  
344 individuals reaches so small values at some point that the drive allele is considered extinct. Then, the  
345 brake allele being costly compared to the wild-type allele, it decreases in frequency and is lost as well.  
346 In Figure 2(b), the population goes extinct. This is because the overall population density goes down to  
347 very small values.

348 As expected, with our parameters, the wild-type population is more rarely recovered with a brake that  
349 does not restore fitness than with a brake that does (compare Figures 2 to S3, and S4 to S5).

350 We hypothesized that allele loss would happen when the amplitude of oscillations increases (i.e. when  
351 the interior equilibrium, where the three alleles coexist, is unstable). However, even when the amplitude  
352 of oscillations decreases (i.e. when the interior equilibrium is locally stable), the initial oscillations can  
353 be substantial, hindering our ability to predict the outcome. In addition, the outcome itself depends on  
354 non-biological contingencies such as the time interval at which the solutions are calculated and the  
355 critical density below which a genotype is considered extinct. As a consequence, a brake is not  
356 guaranteed to prevent the eradication of a population targeted by a threshold-independent drive.

## 357 Stochastic simulations

358 We complemented our exploration with stochastic simulations. Notably, having integer numbers of  
359 individuals of each genotype avoids the arbitrary choice of a critical density below which a genotype is  
360 considered extinct. Importantly, the parameters that we chose in our simulations correspond to a large  
361 wild-type population size (an expected density of  $N^* = 10000$ ); the diversity of observed outcomes is  
362 due to the large amplitude of oscillations in genotype densities triggered by the introduction of the  
363 brake.

364 Among the different parameters investigated, whether or not the brake restored fitness has the highest  
365 impact on the recovery of the wild type population (Figure 3 vs. 4 and 5 vs. 6). Our stochastic  
366 simulations show that in many instances, the brake does not prevent population extinction when it does  
367 not restore fitness (Figures 3 and 5). In contrast, the drive allele is always lost when the brake restores  
368 fitness (Figures 4 and 6), resulting either in the full recovery of the wild-type population, or in a  
369 coexistence between the wild type and the brake at the time at which the simulation ended ( $t_{max} =$   
370  $2500$ ). Noteworthy, as the fitness of the brake approaches that of the wild-type allele, the time  
371 necessary to recover 100% wild-type individuals increases.

372 When the brake does not restore fitness, the recovery of the wild-type population is more frequent when  
373 gene conversion occurs in the zygote than when it occurs in the germline, especially for recessive drives  
374 and brakes ( $h = 0$ , Figure 3 vs. 5). When the brake restores fitness, the timing of conversion has little  
375 effect on the final outcome (compare Figure 4 with Figure 6). The effects of other parameters such as  
376 the type of trait targeted, the level of dominance or the drive frequency at brake introduction are more  
377 difficult to predict. The most frequent outcome in stochastic simulations was often different from the  
378 outcome predicted by deterministic models. For example, population extinction is the most frequent  
379 outcome of some of the stochastic simulations, while the corresponding deterministic model predicts  
380 the recovery of the wild-type population (e.g. Figures 3(a), 5(b)).

381 We cannot draw clear conclusions regarding the optimal timing of introduction of the brake. The  
382 outcome strongly depends on the type of trait that is affected by the drive (and the brake), the level of  
383 dominance and the timing of gene conversion. We conclude, in agreement with the results of Vella *et al.*  
384 *et al.* using infinite population size, that a brake is not guaranteed to prevent the eradication of a population  
385 targeted by a threshold-independent eradication drive.

## 386 Discussion

387 We developed a model to investigate the consequences of introducing a brake allele in a population  
388 targeted by a CRISPR-based homing gene drive. Our framework extends previous ones, which focused  
389 on allele frequencies (ignoring fluctuations in population density) and assumed 100% cleavage  
390 efficiency (Vella *et al.* 2017; Girardin *et al.* 2019). By accounting for the effects of both the initial gene  
391 drive and the brake on population size, our model represents a first step towards the explicit integration  
392 of changes in population size into the prediction of the dynamics of wild-type, gene drive and brake  
393 alleles. While we concentrate here our numerical explorations on eradication drives and threshold-  
394 independent drives, our model can also be used to study the dynamics of replacement drives and their  
395 brakes, by adapting parameter values. Our model can form a basis for future studies investigating the  
396 effect of CRISPR-based brakes against other types of gene drives (e.g. split gene drives; Li *et al.* 2020),  
397 to check whether these alternatives might be easier to control.

398 Our model does not account for the potential evolution of resistance against gene drives. Such resistance  
399 can be due to cleavage repair by non-homologous end joining or to natural variation at the target locus,  
400 and can occur frequently after the release of gene drive individuals (Drury *et al.* 2017; Unckless *et al.*  
401 2017; Bull *et al.* 2019). However, several strategies are under way to prevent the evolution of gene drive  
402 resistance, such as the use of multiple gRNAs (Champer *et al.* 2018; Oberhofer *et al.* 2018; Edgington  
403 *et al.* 2020) or the targeting of a functionally constrained locus whose mutations are highly deleterious  
404 and cannot increase in frequency (e.g. Kyrrou *et al.* 2018). Given these efforts to limit the evolution of  
405 resistance against gene drives, we chose not to include this feature in our model. In addition, Vella *et*  
406 *al.* (2017) investigated the evolution of resistance at the target locus in addition to the introduction of a  
407 countermeasure and found that the qualitative behavior of the brake remains unchanged (polymorphic  
408 equilibrium of all alleles).

409 Furthermore, we did not model the evolution of resistance against brakes either. If such resistant alleles  
410 were to form, for the types of brakes we investigated, the consequences would differ between ERACR  
411 and CATCHA brakes. For ERACR brakes, mutations arising in flanking sequences targeted by the  
412 brake could prevent cleavage and conversion of the drive into a brake. If these mutations do not alter  
413 the rate of conversion of the wild-type allele into a drive allele, a drive resistant to the ERACR brake  
414 could continue spreading. Thus, ERACR brake could fail to prevent a population from extinction. For  
415 CATCHA brakes, mutations in the target *cas9* sequence would result in non-functional Cas9 enzymes.  
416 These brake-resistant alleles would have the same fitness cost as the drive allele, but without the gene-  
417 conversion advantage of the drive. Should they appear, they would be expected to remain at a low  
418 frequency in the population. Overall, we thus expect CATCHA brakes to overcome the evolution of  
419 resistance against brake while ERACR brakes would not, so we recommend using the former.

420 Overall, our model shows that the success of recovering the wild-type population using a brake depends  
421 both on the type of brake introduced and the type of gene drive targeted. More specifically, our  
422 conclusions depend on the method chosen to explore the model. Our stability analysis indicates that the  
423 wild-type population can only be recovered after the introduction of a brake if the drive is threshold-  
424 dependent. Nevertheless, our numerical integration of the model -- including a critical population  
425 density to avoid unrealistically low genotype densities -- and stochastic simulations show that the wild-  
426 type population can also be recovered in certain cases when a threshold-independent drive is used. In  
427 these cases, brakes that restore fitness can better control a gene drive than universal brakes that do not.  
428 However, we could not draw general conclusions on the effect of other parameters (e.g. fitness trait  
429 affected by the drive, dominance level, timing of conversion, and frequency of the drive for introducing  
430 the brake) on the final outcome.

431 Our model shows that, even when the brake is introduced when the eradication drive is still at a low  
432 frequency, the frequency of the eradication drive continues to increase and results in a strong population  
433 bottleneck (e.g. Figure 1a). Such a strong bottleneck could result in a long term alteration of the  
434 recovered wild-type population (e.g. due to inbreeding depression). This point is important to keep in  
435 mind even though it is not explicitly incorporated in our model.

436 Our study has practical implications. First, we advise against using universal brakes as the sole  
437 countermeasure because they are not guaranteed to succeed and stop a drive. In contrast, we recommend  
438 using specific brakes which restore fitness, as they are more likely to be effective. They spread at a  
439 faster rate and increase the chances of recovering a population of wild-type individuals when they  
440 include a recoded version of the gene disrupted by the initial gene drive. We recommend that the  
441 development of homing gene drives goes in pair with the co-development of such specific brakes.  
442 Although they are not guaranteed to be successful, specific brakes currently represent the best

443 countermeasure against the spread of homing drives following an escape from a laboratory. We also  
444 recommend laboratory studies to assess the efficacy of brakes using experimental evolution under  
445 controlled conditions. Second, because they are easier to control with brake, we believe that threshold-  
446 dependent homing gene drives are a safer alternative to threshold-independent homing drives, that are  
447 currently being developed in laboratories. These threshold-independent homing drives are  
448 characterized by large and recessive large fitness costs, high conversion efficiency and germline  
449 conversion (e.g. Kyrou *et al.* 2018). Several studies (Tanaka *et al.* 2017; Min *et al.* 2018) have  
450 recommended the use of spatially and/or temporally limited threshold-dependent homing drives,  
451 because they are less likely to spread into non-target populations. However, we emphasize that it might  
452 be difficult in practice to implement a threshold-dependent drive whose threshold remains as expected  
453 for several reasons. First, theoretical models show that the range of parameter values for threshold-  
454 dependent gene drives is larger when conversion occurs in the zygote than when it occurs in the  
455 germline (compare Figures 1 and 4 in Deredec *et al.* 2008; Figure S1-S2). So ideally, it might be better  
456 to use drives with conversion in the zygote. Nevertheless, such drives are more difficult to create and  
457 so far all homing drives have been engineered with germline promoters (Table 2 in Courtier-Orgogozo  
458 *et al.* 2019b). A few conserved genes are expressed in the germline of all animals (*nanos*, *vasa*, *piwi*;  
459 Extavour and Akam 2003; Juliano *et al.* 2010) and their promoters constitute preferred tools for  
460 engineering gene drive constructs in various animal species, in contrast to zygotically expressed genes,  
461 which tend to be less conserved across taxa (Heyn *et al.* 2014). Second, “real life” ecological conditions  
462 are likely to alter the genetic parameters of any gene drive, in particular its fitness cost. Fitness costs  
463 are difficult to estimate in the field and can vary either across genomic backgrounds, spatially or  
464 temporally (Marshall and Hay 2012; Backus and Delborne 2019). Hence, depending on ecological  
465 conditions, the threshold-value for the invasion of a threshold-dependent homing drive could change,  
466 or even decrease to 0. Thus, a homing drive that is threshold-dependent in the laboratory might turn  
467 into a threshold-independent drive in the wild.

468

## 469 Conclusion

470 Our model is a step towards the development of more complex analytical models of gene drive that  
471 account for the feedback between population demography and evolution. Our results suggest that the  
472 recessive eradication drives with germline conversion currently developed in mosquitoes (e.g. Kyrou *et al.*  
473 *et al.* 2018) are likely to be threshold-independent and could be particularly difficult to control using  
474 brakes. In addition, our results show that a brake that carries a version of the gene disrupted by the  
475 initial gene drive, and therefore restores fitness, can prevent the extinction of the target population under  
476 certain conditions. We think that the development of countermeasures should go in par with the  
477 development of drives. Given the diversity of outcomes that we find and the difficulty to precisely  
478 estimate the relevant parameters determining each outcome, specific experimental studies will be  
479 necessary to confirm modelling outcomes that a given brake can indeed stop the spread of drives. A  
480 brake should not be considered reliable before population experiments are carried out.

481

## 482 Acknowledgements:

483 We thank Arnaud Martin for discussions. Funding for this project was provided by European Research  
484 Council (FP7/2007-2013 Grant Agreement no. 337579) to VCO, ANR-14-ACHN-0003 and ANR-19-



485 CE45-0009-01 to FD and the CeMEB LabEx/University of Montpellier (ANR-10-LABX-04-01) and  
486 an INRAE-SPE starting grant to NOR.

487 Authors contributions: VCO brought the research topic, all authors developed the model, FD did the  
488 analysis, implemented numerical solutions, ran stochastic simulations and prepared the figures. All  
489 authors analysed data and wrote the manuscript.

490

## 491 **Literature cited**

492

493 Akbari O. S., K. D. Matzen, J. M. Marshall, H. Huang, C. M. Ward, *et al.*, 2013 A synthetic gene

494 drive system for local, reversible modification and suppression of insect populations. *Curr.*

495 *Biol.* 23: 671–677.

496 Akbari O. S., H. J. Bellen, E. Bier, S. L. Bullock, A. Burt, *et al.*, 2015 Safeguarding gene drive

497 experiments in the laboratory. *Science* 349: 927–929.

498 Alphey N., and M. B. Bonsall, 2014 Interplay of population genetics and dynamics in the genetic

499 control of mosquitoes. *J. R. Soc. Interface* 11: 20131071.

500 Backus G. A., and J. A. Delborne, 2019 Threshold-dependent gene drives in the wild: spread,

501 controllability, and ecological uncertainty. *BioScience* 69: 900–907.

502 Bull J. J., C. H. Remien, R. Gomulkiewicz, and S. M. Krone, 2019 Spatial structure undermines

503 parasite suppression by gene drive cargo, (D. Lahr, Ed.). *PeerJ* 7: e7921.

504 <https://doi.org/10.7717/peerj.7921>

505 Burt A., 2003 Site-specific selfish genes as tools for the control and genetic engineering of natural

506 populations. *Proc. R. Soc. B Biol. Sci.* 270: 921–928. <https://doi.org/10.1098/rspb.2002.2319>

507 Champer J., A. Buchman, and O. S. Akbari, 2016 Cheating evolution: engineering gene drives to

508 manipulate the fate of wild populations. *Nat. Rev. Genet.* 17: 146–159.

509 <https://doi.org/10.1038/nrg.2015.34>

510 Champer J., J. Liu, S. Y. Oh, R. Reeves, A. Luthra, *et al.*, 2018 Reducing resistance allele formation

511 in CRISPR gene drive. *Proc. Natl. Acad. Sci.* 115: 5522–5527.

512 <https://doi.org/10.1073/pnas.1720354115>

513 Champer J., E. Lee, E. Yang, C. Liu, A. G. Clark, *et al.*, 2020 A toxin-antidote CRISPR gene drive



- 514 system for regional population modification. *Nat. Commun.* 11: 1082.  
515 <https://doi.org/10.1038/s41467-020-14960-3>
- 516 Courtier-Orgogozo V., A. Danchin, P.-H. Gouyon, and C. Boëte, 2019a Evaluating the Probability of  
517 CRISPR-based Gene Drive Contaminating Another Species. *bioRxiv* 776609.
- 518 Courtier-Orgogozo V., A. Danchin, P.-H. Gouyon, and C. Boëte, 2019b Evaluating the Probability of  
519 CRISPR-based Gene Drive Contaminating Another Species. *BioRxiv* 776609.
- 520 Del Amo V. L., A. L. Bishop, J. B. Bennett, X. Feng, J. M. Marshall, *et al.*, 2020 A  
521 transcomplementing gene drive provides a flexible platform for laboratory investigation and  
522 potential field deployment. *Nat. Commun.* 11: 1–12.
- 523 Deredec A., A. Burt, and H. C. J. Godfray, 2008 The Population Genetics of Using Homing  
524 Endonuclease Genes in Vector and Pest Management. *Genetics* 179: 2013–2026.  
525 <https://doi.org/10.1534/genetics.108.089037>
- 526 DiCarlo J. E., A. Chavez, S. L. Dietz, K. M. Esvelt, and G. M. Church, 2015 Safeguarding CRISPR-  
527 Cas9 gene drives in yeast. *Nat. Biotechnol.* 33: 1250–1255. <https://doi.org/10.1038/nbt.3412>
- 528 Drury D. W., A. L. Dapper, D. J. Siniard, G. E. Zentner, and M. J. Wade, 2017 CRISPR/Cas9 gene  
529 drives in genetically variable and nonrandomly mating wild populations. *Sci. Adv.* 8.
- 530 Edgington M. P., T. Harvey-Samuel, and L. Alphey, 2020 Population-level multiplexing, a promising  
531 strategy to manage the evolution of resistance against gene drives targeting a neutral locus.  
532 *Evol. Appl.* n/a. <https://doi.org/10.1111/eva.12945>
- 533 Esvelt K. M., A. L. Smidler, F. Catteruccia, and G. M. Church, 2014 Emerging technology:  
534 concerning RNA-guided gene drives for the alteration of wild populations. *Elife* 3: e03401.
- 535 Extavour C. G., and M. Akam, 2003 Mechanisms of germ cell specification across the metazoans:  
536 epigenesis and preformation. *Development* 130: 5869–5884.
- 537 Gantz V. M., and E. Bier, 2016 The dawn of active genetics. *BioEssays* 38: 50–63.  
538 <https://doi.org/10.1002/bies.201500102>
- 539 Girardin L., V. Calvez, and F. Débarre, 2019 Catch me if you can: a spatial model for a brake-driven  
540 gene drive reversal. *Bull. Math. Biol.* 81: 5054–5088.
- 541 Gurwitz D., 2014 Gene drives raise dual-use concerns. *Science* 345: 1010–1010.

- 542 Heyn P., M. Kircher, A. Dahl, J. Kelso, P. Tomancak, *et al.*, 2014 The earliest transcribed zygotic  
543 genes are short, newly evolved, and different across species. *Cell Rep.* 6: 285–292.
- 544 Juliano C. E., S. Z. Swartz, and G. M. Wessel, 2010 A conserved germline multipotency program.  
545 *Development* 137: 4113–4126.
- 546 Kyrou K., A. M. Hammond, R. Galizi, N. Kranjc, A. Burt, *et al.*, 2018 A CRISPR–Cas9 gene drive  
547 targeting doublesex causes complete population suppression in caged *Anopheles gambiae*  
548 mosquitoes. *Nat. Biotechnol.* <https://doi.org/10.1038/nbt.4245>
- 549 Leitschuh C. M., D. Kanavy, G. A. Backus, R. X. Valdez, M. Serr, *et al.*, 2018 Developing gene drive  
550 technologies to eradicate invasive rodents from islands. *J. Responsible Innov.* 5: S121–S138.  
551 <https://doi.org/10.1080/23299460.2017.1365232>
- 552 Li F., and M. J. Scott, 2016 CRISPR/Cas9-mediated mutagenesis of the white and Sex lethal loci in  
553 the invasive pest, *Drosophila suzukii*. *Biochem. Biophys. Res. Commun.* 469: 911–916.
- 554 Marshall J. M., and B. A. Hay, 2012 Confinement of gene drive systems to local populations: a  
555 comparative analysis. *J. Theor. Biol.* 294: 153–171.
- 556 Marshall J. M., and O. S. Akbari, 2018 Can CRISPR-Based Gene Drive Be Confined in the Wild? A  
557 Question for Molecular and Population Biology. *ACS Chem. Biol.* 13: 424–430.  
558 <https://doi.org/10.1021/acscchembio.7b00923>
- 559 Montenegro de Wit M., 2019 Gene driving the farm: who decides, who owns, and who benefits?  
560 *Agroecol. Sustain. Food Syst.* 43: 1054–1074.
- 561 Nagylaki T., and J. F. Crow, 1974 Continuous selective models. *Theor. Popul. Biol.* 5: 257–283.
- 562 NASEM, 2016 *Gene Drives on the Horizon: Advancing Science, Navigating Uncertainty, and*  
563 *Aligning Research with Public Values*. National Academies Press, Washington, D.C.
- 564 Noble C., J. Olejarz, K. M. Esvelt, G. M. Church, and M. A. Nowak, 2017 Evolutionary dynamics of  
565 CRISPR gene drives. *Sci. Adv.* 8.
- 566 Noble C., B. Adlam, G. M. Church, K. M. Esvelt, and M. A. Nowak, 2018 Current CRISPR gene  
567 drive systems are likely to be highly invasive in wild populations. *eLife* 7: e33423.
- 568 Noble C., J. Min, J. Olejarz, J. Buchthal, A. Chavez, *et al.*, 2019 Daisy-chain gene drives for the  
569 alteration of local populations. *Proc. Natl. Acad. Sci.* 116: 8275–8282.

- 570 Oberhofer G., T. Ivy, and B. A. Hay, 2018 Behavior of homing endonuclease gene drives targeting  
571 genes required for viability or female fertility with multiplexed guide RNAs. *Proc. Natl.*  
572 *Acad. Sci.* 115: E9343. <https://doi.org/10.1073/pnas.1805278115>
- 573 Oye K. A., K. Esvelt, E. Appleton, F. Catteruccia, G. Church, *et al.*, 2014 Regulating gene drives.  
574 *Science* 345: 626–628. <https://doi.org/10.1126/science.1254287>
- 575 Raban R. R., J. M. Marshall, and O. S. Akbari, 2020 Progress towards engineering gene drives for  
576 population control. *J. Exp. Biol.* 223.
- 577 Rode N. O., A. Estoup, D. Bourguet, V. Courtier-Orgogozo, and F. Débarre, 2019 Population  
578 management using gene drive: molecular design, models of spread dynamics and assessment  
579 of ecological risks. *Conserv. Genet.* 20: 671–690. [https://doi.org/10.1007/s10592-019-01165-](https://doi.org/10.1007/s10592-019-01165-5)  
580 5
- 581 Scott M. J., F. Gould, M. Lorenzen, N. Grubbs, O. Edwards, *et al.*, 2018 Agricultural production:  
582 assessment of the potential use of Cas9-mediated gene drive systems for agricultural pest  
583 control. *J. Responsible Innov.* 5: S98–S120. <https://doi.org/10.1080/23299460.2017.1410343>
- 584 Tanaka H., H. A. Stone, and D. R. Nelson, 2017 Spatial gene drives and pushed genetic waves. *Proc.*  
585 *Natl. Acad. Sci.* 114: 8452–8457.
- 586 Unckless R. L., P. W. Messer, T. Connallon, and A. G. Clark, 2015 Modeling the Manipulation of  
587 Natural Populations by the Mutagenic Chain Reaction. *Genetics* 201: 425–431.  
588 <https://doi.org/10.1534/genetics.115.177592>
- 589 Unckless R. L., A. G. Clark, and P. W. Messer, 2017 Evolution of Resistance Against CRISPR/Cas9  
590 Gene Drive. *Genetics* 205: 827–841. <https://doi.org/10.1534/genetics.116.197285>
- 591 Vella M. R., C. E. Gunning, A. L. Lloyd, and F. Gould, 2017 Evaluating strategies for reversing  
592 CRISPR-Cas9 gene drives. *Sci. Rep.* 7. <https://doi.org/10.1038/s41598-017-10633-2>
- 593 Webster S. H., M. R. Vella, and M. J. Scott, 2019 Development and testing of a novel Killer-Rescue  
594 self-limiting gene drive system in *Drosophila melanogaster*. *bioRxiv* 680629.  
595 <https://doi.org/10.1101/680629>
- 596 Wu B., L. Luo, and X. J. Gao, 2016 Cas9-triggered chain ablation of cas9 as a gene drive brake. *Nat.*  
597 *Biotechnol.* 34: 137–138. <https://doi.org/10.1038/nbt.3444>

598

599

## 600 Appendix

601 In the main text, the change over time in the density of individuals of genotype  $g$  is given by

$$602 \quad \frac{dN_g}{dt} = \omega_g V_g N (1 - N/K) - d_g N_g.$$

603 We provide below the expressions for  $V_g$  for the two timings of gene conversion that we consider in  
604 the article.

### 605 Germline conversion

606 When gene conversion takes place in the germline, individuals born heterozygous remain  
607 heterozygous as adults, their life-history parameters are those of heterozygotes, but then gene  
608 conversion takes place in the germline, and if successful, predominantly one type of gamete is  
609 produced by the individual. We have

$$610 \quad V_{00} = \frac{\gamma_0^2}{N^2}, V_{0D} = \frac{2\gamma_0\gamma_D}{N^2}, V_{DD} = \frac{\gamma_D^2}{N^2}, V_{0B} = \frac{2\gamma_0\gamma_B}{N^2}, V_{DB} = \frac{2\gamma_D\gamma_B}{N^2}, V_{BB} = \frac{\gamma_B^2}{N^2},$$

611 where

$$612 \quad \gamma_0 = \beta_{00}N_{00} + \frac{1}{2}\beta_{0D}N_{0D}(1 - c_D) + \frac{1}{2}\beta_{0B}N_{0B},$$

$$613 \quad \gamma_D = \beta_{DD}N_{DD} + \frac{1}{2}\beta_{0D}N_{0D}(1 + c_D) + \frac{1}{2}\beta_{DB}N_{DB}(1 - c_B),$$

$$614 \quad \gamma_B = \beta_{BB}N_{BB} + \frac{1}{2}\beta_{0B}N_{0B} + \frac{1}{2}\beta_{DB}N_{DB}(1 + c_B).$$

### 615 Zygote conversion

616 When conversion takes place in zygotes, and when gene conversion is successful, an initially  
617 heterozygous zygote becomes homozygous, and develops into a homozygous adult. We have

$$618 \quad V_{00} = \frac{\gamma_0^2}{N^2}, V_{0D} = (1 - c_D) \frac{2\gamma_0\gamma_D}{N^2}, V_{DD} = c_D \frac{2\gamma_0\gamma_D}{N^2} + \frac{\gamma_D^2}{N^2},$$

$$619 \quad V_{0B} = \frac{2\gamma_0\gamma_B}{N^2}, V_{DB} = (1 - c_B) \frac{2\gamma_D\gamma_B}{N^2}, V_{BB} = c_B \frac{2\gamma_D\gamma_B}{N^2} + \frac{\gamma_B^2}{N^2},$$

620 where

$$621 \quad \gamma_0 = \beta_{00}N_{00} + \frac{1}{2}\beta_{0D}N_{0D} + \frac{1}{2}\beta_{0B}N_{0B},$$

$$622 \quad \gamma_D = \beta_{DD}N_{DD} + \frac{1}{2}\beta_{0D}N_{0D} + \frac{1}{2}\beta_{DB}N_{DB},$$

$$623 \quad \gamma_B = \beta_{BB}N_{BB} + \frac{1}{2}\beta_{0B}N_{0B} + \frac{1}{2}\beta_{DB}N_{DB}.$$

## Figures

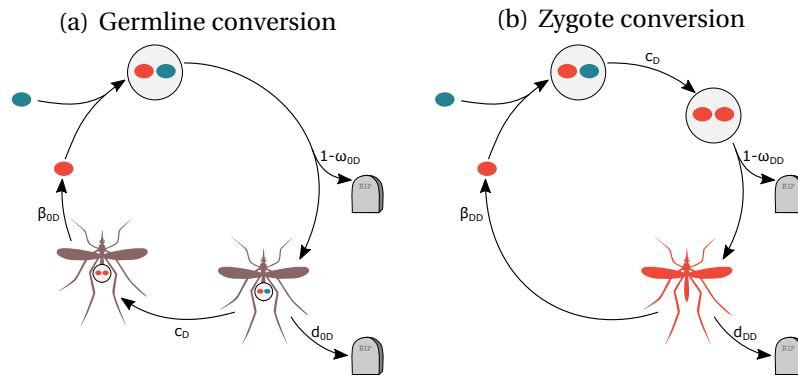

**Figure 1:** Life-cycles with the two timings of gene conversion, germline (a) and zygote (b). The blue color corresponds to the wild-type allele, the red color to the drive allele and drive-homozygous individuals; the drive/wild-type heterozygous individual is represented in purple. The tombstone represents death. Notation: 0: WT, D: drive;  $c$  probability of gene conversion;  $\omega$ : zygote survival;  $d$ : adult mortality;  $\beta$ : adult fecundity.



### Conversion in the germline, brake does not restore fitness

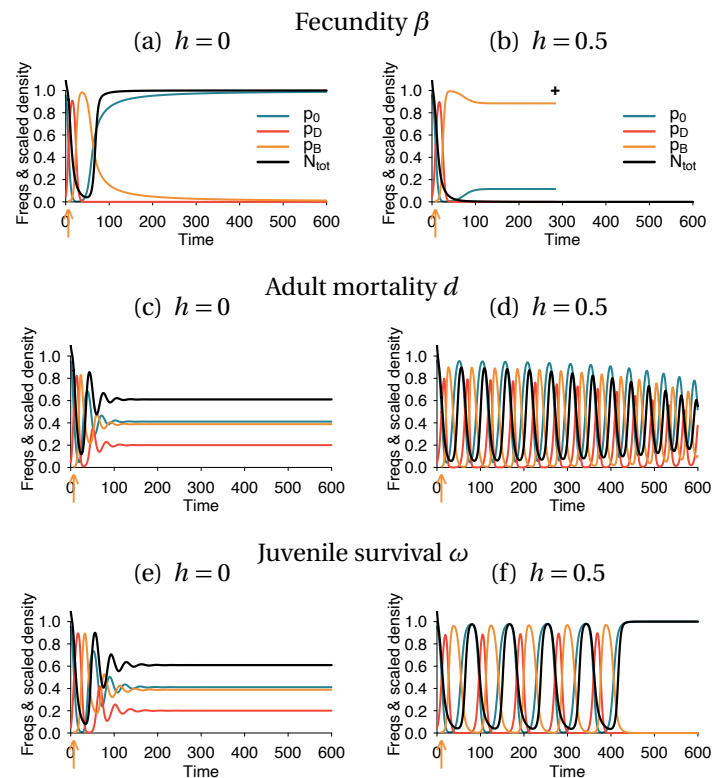

**Figure 2:** Deterministic dynamics of the frequencies of each allele in the population, and scaled total population size (black curve). Conversion takes place in the germline, and the brake does not restore fitness. Population size is scaled relative to the equilibrium size of a 100% wild-type population ( $K(1 - d_{00}/(\beta_{00}^2 \omega_{00}))$ ). The arrow indicates the timing of drive introduction, here chosen to be when the drive allele is at 50% ( $f_I = 0.5$ ). A cross indicates population extinction.

### Conversion in the germline, brake does not restore fitness

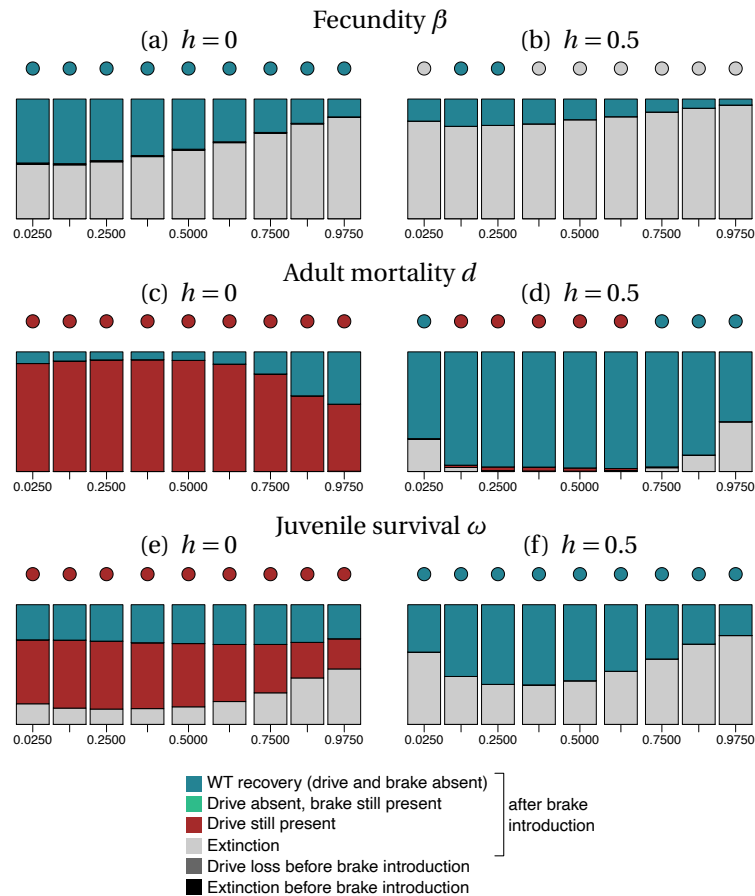

**Figure 3:** Frequency of each type of outcome in the simulations (color-coded), depending on the frequency of drive  $f_i$  at the time at which the drive is introduced (horizontal axis), on the dominance coefficient  $h$  (columns) and on the trait that is affected by the drive and the brake (rows). The dots show, with the same color code, the output of the deterministic model.

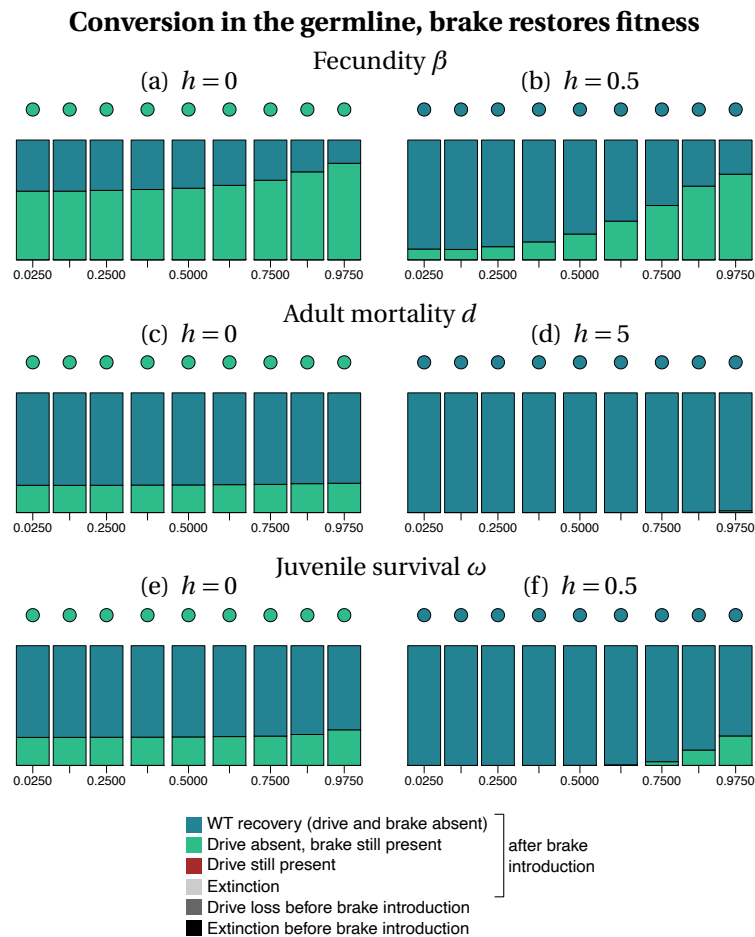

**Figure 4:** Frequency of each type of outcome in the simulations (color-coded), depending on the frequency of drive  $f_i$  at the time at which the drive is introduced (horizontal axis), on the dominance coefficient  $h$  (columns) and on the trait that is affected by the drive and the brake (rows). The dots show, with the same color code, the output of the deterministic model.

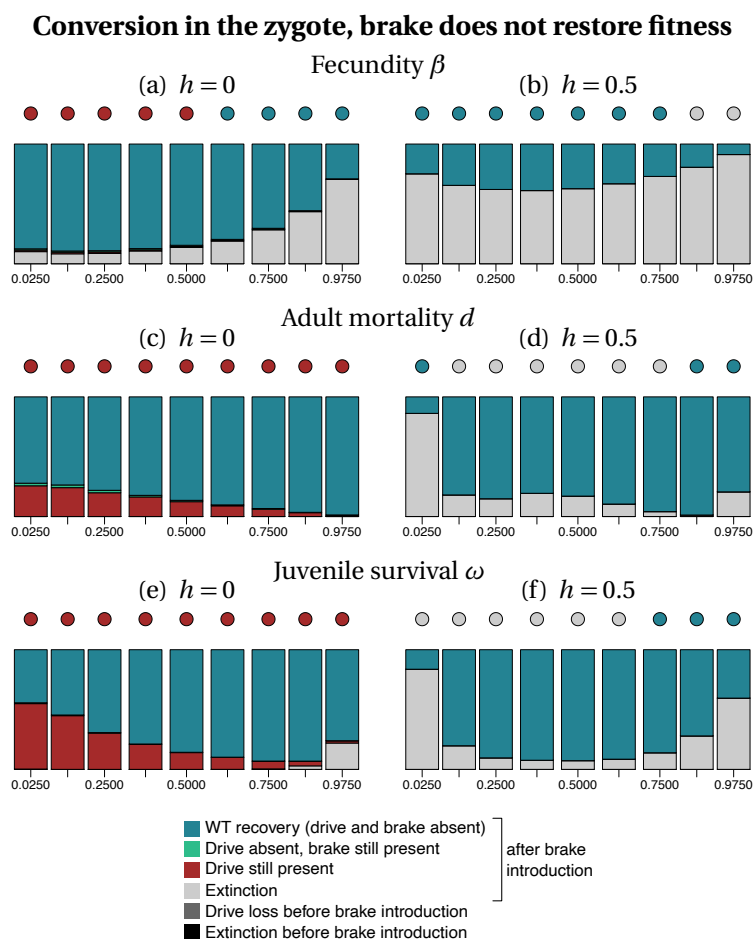

**Figure 5:** Frequency of each type of outcome in the simulations (color-coded), depending on the frequency of drive  $f_i$  at the time at which the drive is introduced (horizontal axis), on the dominance coefficient  $h$  (columns) and on the trait that is affected by the drive and the brake (rows). The dots show, with the same color code, the output of the deterministic model.

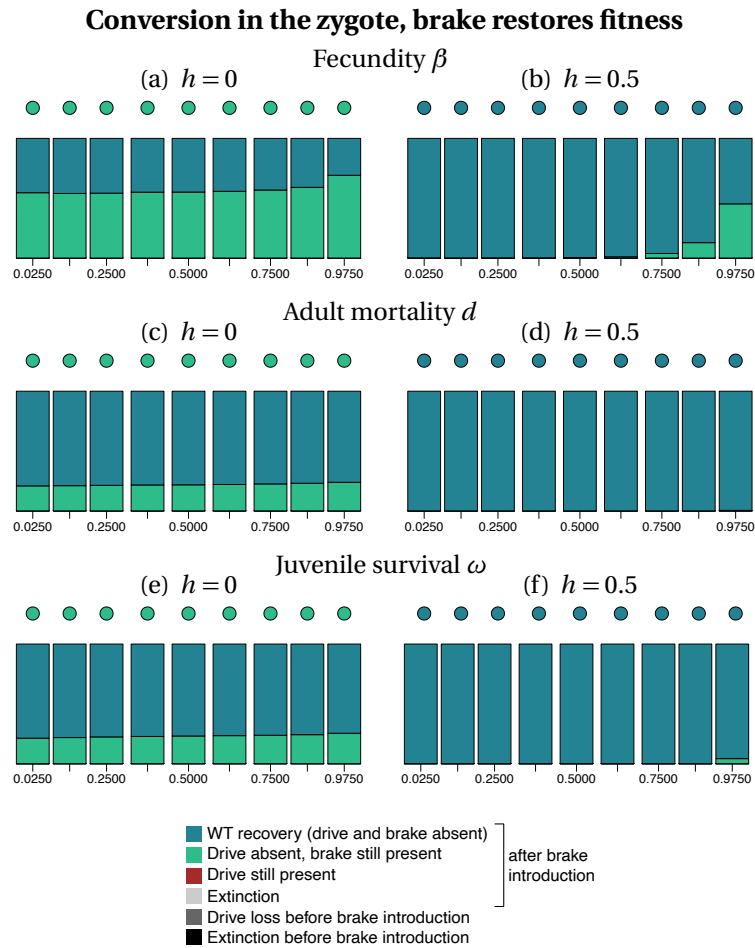

**Figure 6:** Frequency of each type of outcome in the simulations (color-coded), depending on the frequency of drive  $f_i$  at the time at which the drive is introduced (horizontal axis), on the dominance coefficient  $h$  (columns) and on the trait that is affected by the drive and the brake (rows). The dots show, with the same color code, the output of the deterministic model.

|                |       |
|----------------|-------|
| $K$            | 25000 |
| $c_D$          | 0.9   |
| $c_B$          | 0.8   |
| $N_{0D}^{(0)}$ | 1000  |
| $N_{0B}^{(0)}$ | 100   |
| $t_{\max}$     | 2500  |

**Table S1:** Fixed parameters

|                                |                                                               |
|--------------------------------|---------------------------------------------------------------|
| $f_I$                          | {0.025, 0.1375, 0.25, 0.375, 0.5, 0.625, 0.75, 0.8625, 0.975} |
| $h_{D0} = h_{B0} = h_{DB} = h$ | {0, 0.5}                                                      |
| $convType$                     | {Z, G}                                                        |

**Table S2:** Varying parameters

| Scenario #    | (1)                      | (2)      | (3)     | (4)              | (5)      | (6)     |
|---------------|--------------------------|----------|---------|------------------|----------|---------|
| Brake...      | does not restore fitness |          |         | restores fitness |          |         |
| Effects on    | $d$                      | $\omega$ | $\beta$ | $d$              | $\omega$ | $\beta$ |
| $d_{00}$      | 0.6                      | 0.6      | 0.6     | 0.6              | 0.6      | 0.6     |
| $d_{DD}$      | 1.1                      | 0.6      | 0.6     | 1.1              | 0.6      | 0.6     |
| $d_{BB}$      | 1.1                      | 0.6      | 0.6     | 0.64             | 0.6      | 0.6     |
| $\omega_{00}$ | 1.0                      | 1.0      | 1.0     | 1.0              | 1.0      | 1.0     |
| $\omega_{DD}$ | 1.0                      | 0.545    | 1.0     | 1.0              | 0.545    | 1.0     |
| $\omega_{BB}$ | 1.0                      | 0.545    | 1.0     | 1.0              | 0.938    | 1.0     |
| $\beta_{00}$  | 1.0                      | 1.0      | 1.0     | 1.0              | 1.0      | 1.0     |
| $\beta_{DD}$  | 1.0                      | 1.0      | 0.738   | 1.0              | 1.0      | 0.738   |
| $\beta_{BB}$  | 1.0                      | 1.0      | 0.738   | 1.0              | 1.0      | 0.968   |

**Table S3:** Parameters for the different scenarios, depending on whether the brake restores fitness (modulo a small cost) or not, and on which life-history parameter is affected (adult survival  $d$ , zygote survival  $\omega$ , adult fecundity  $\beta$ ).



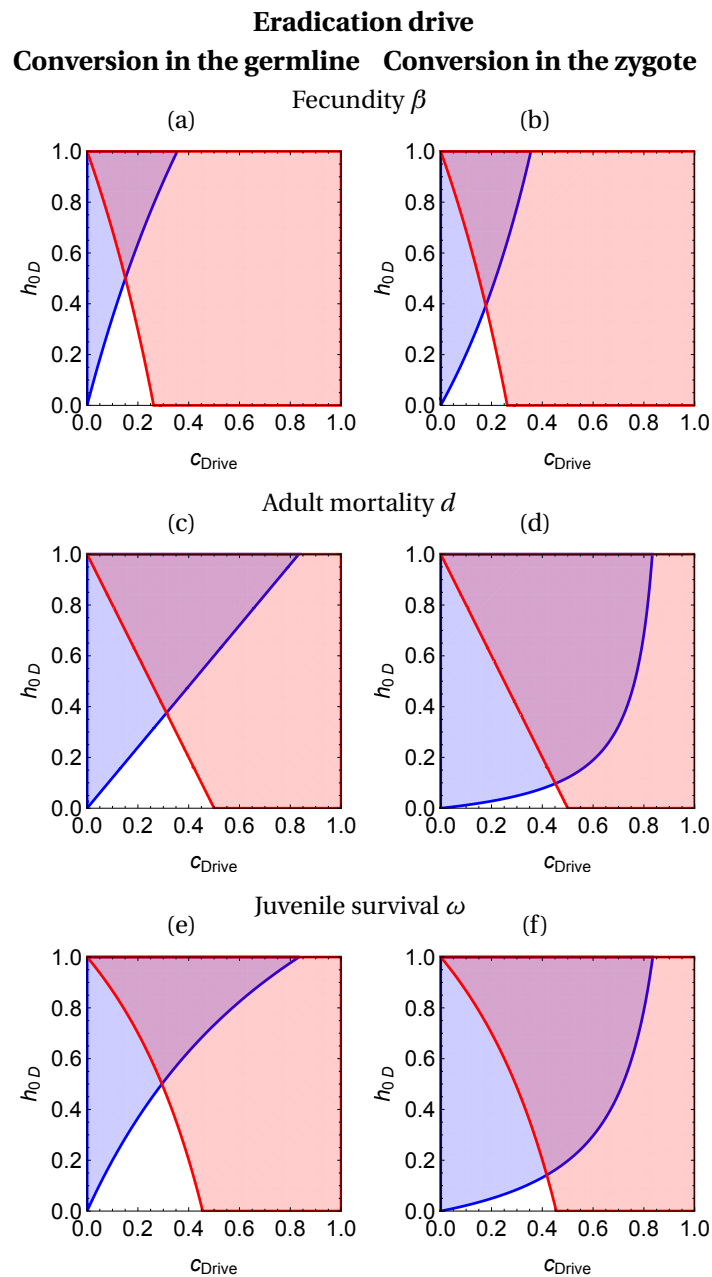

**Figure S1:** Local stabilities of the drive-only and the wild-type only equilibria in the absence of brake, for an eradication drive. The wild-type only equilibrium is locally stable in the blue-shaded region left of the blue curve; the drive-only equilibrium is locally stable in the red-shaded region right of the red curve. Neither equilibrium is locally stable in the white area, in which the two alleles coexist. Both equilibria are locally stable in the purple area; the final outcome depends on the initial conditions (bistability). Drives whose parameters put them in the purple area are threshold-dependent.

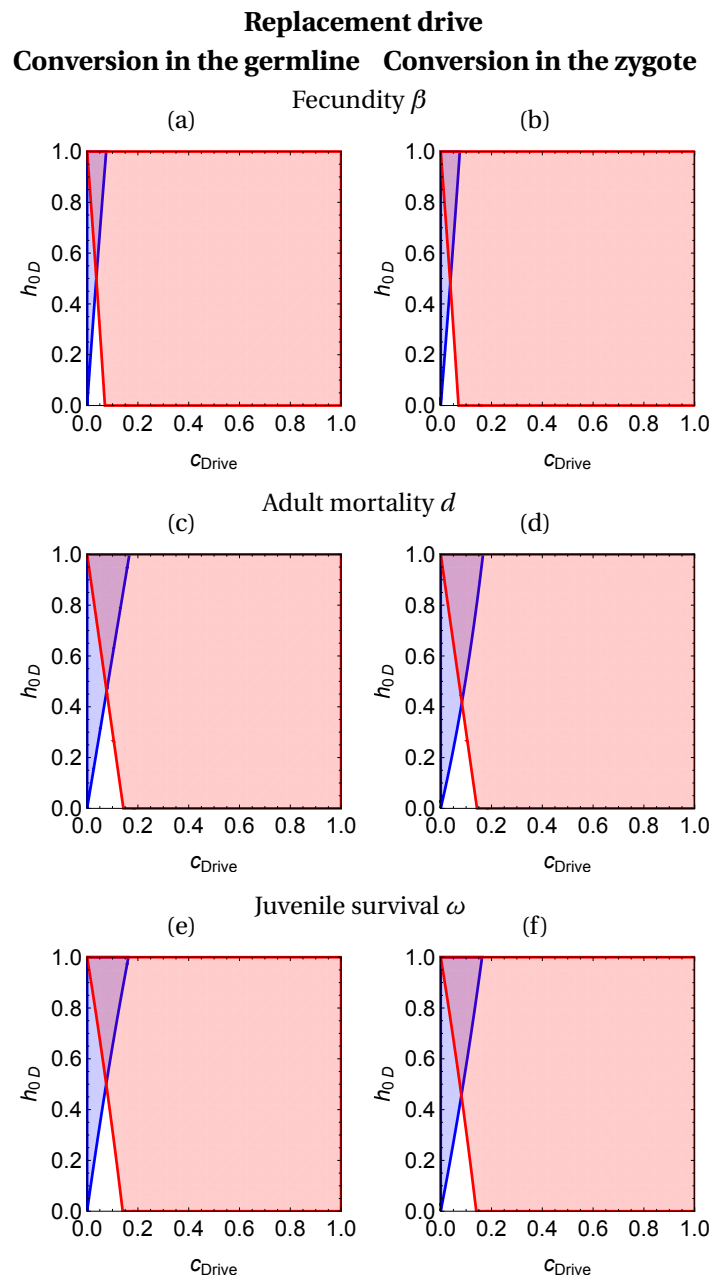

**Figure S2:** Local stabilities of the drive-only and the wild-type only equilibria in the absence of brake, for a replacement drive. The legend is the same as figure S1.

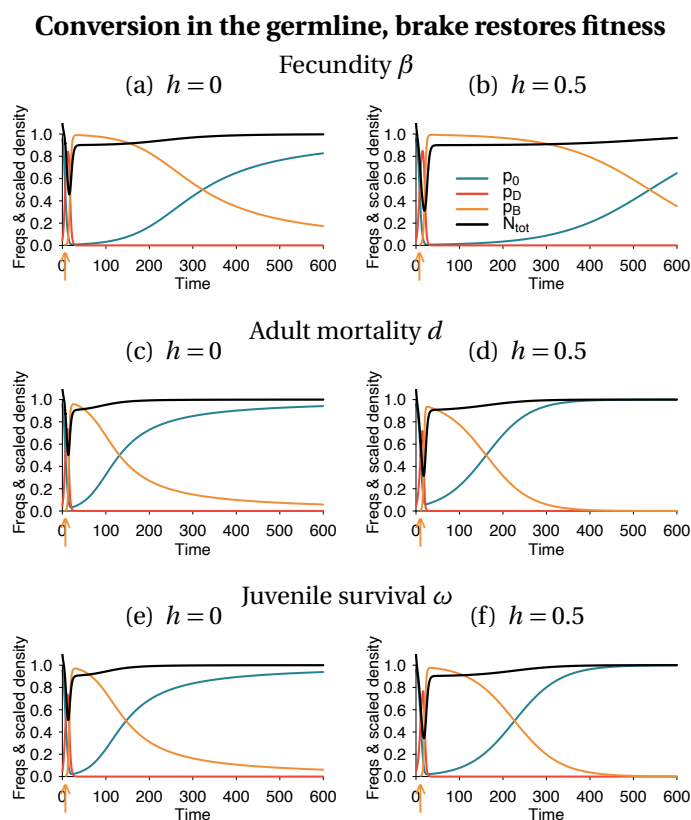

**Figure S3:** Same legend as figure 2.

### Conversion in the zygote, brake does not restore fitness

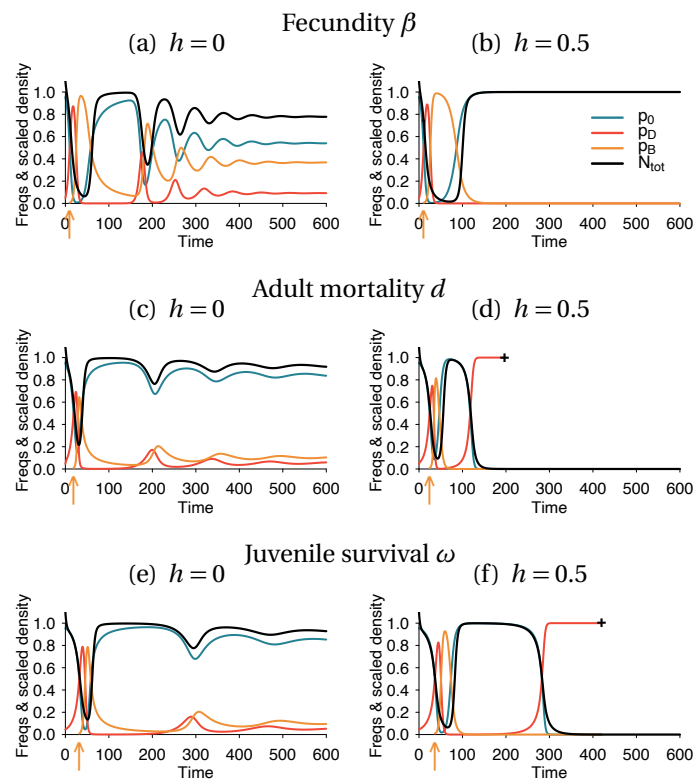

**Figure S4:** Same as figure 2

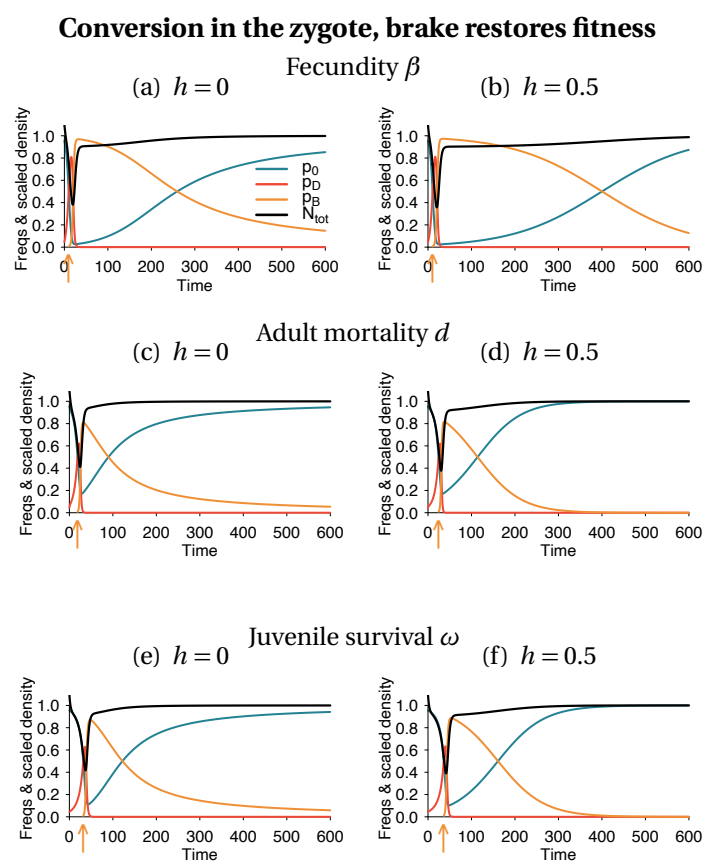

**Figure S5:** Same as figure 2

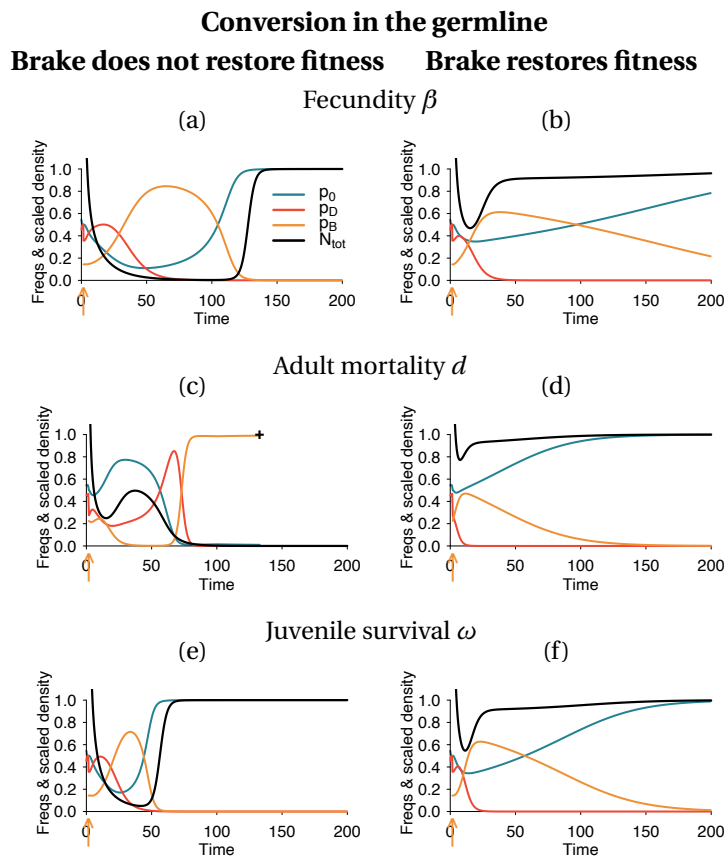

**Figure S6:** Deterministic dynamics when the drive is threshold-dependent; conversion takes place in the germline. Parameters are the same as in the other figures, except for the dominance parameter ( $h = 1$ ) and for conversion efficiencies ( $c_D = 0.3$ ,  $c_B = 0.25$  in panels (a)–(b);  $c_D = 0.6$ ,  $c_B = 0.55$  in panels (c)–(d);  $c_D = 0.5$ ,  $c_B = 0.45$  in panels (e)–(f)). Introduction densities are  $N_{0D} = 10^5$  and  $N_{0B} = 10^4$ .

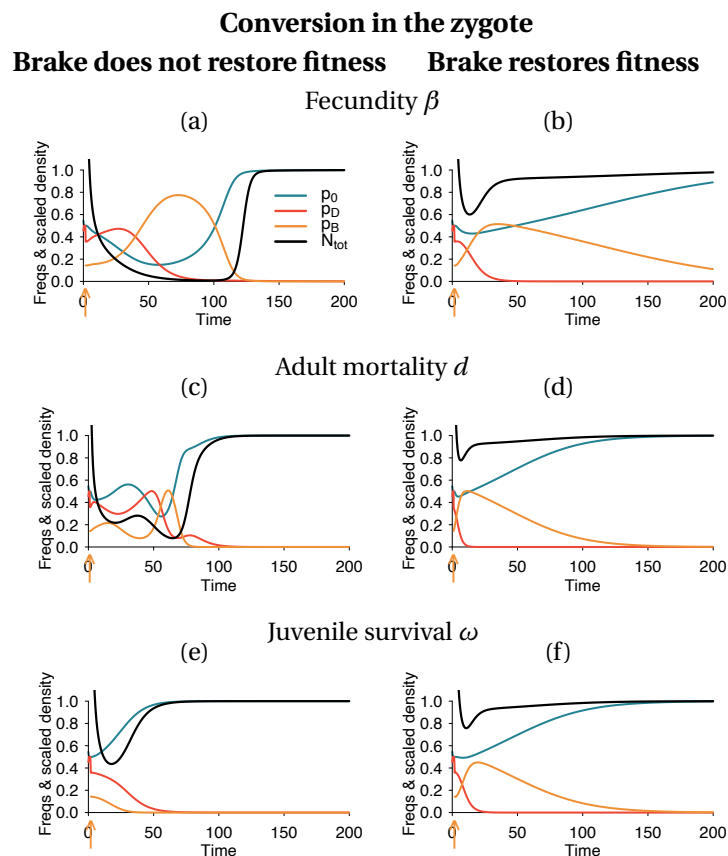

**Figure S7:** Deterministic dynamics when the drive is threshold-dependent; conversion takes place in the zygote. See figure S6 for parameter values.
